# Supplementary material for: HERV-Derived Ervpb1 Is Conserved in Simiiformes, Exhibiting Expression in Hematopoietic Cell Lineages Including Macrophages
Source: MDPI journal article supplement (doi:10.3390/ijms22094504), 2021-04-26
Supplement: s1 [file s1]

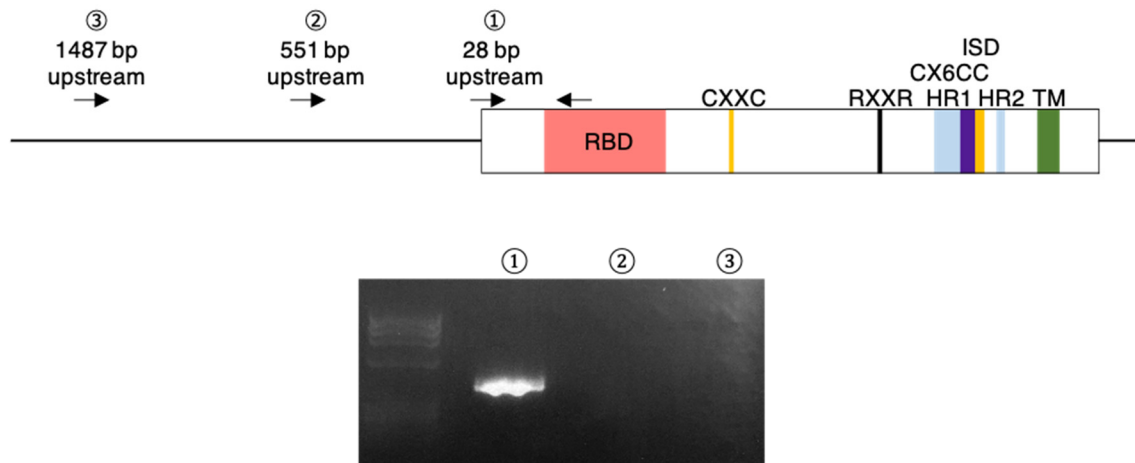

**Figure S1.** Confirmation of ERVPb1 upstream sequence by RT-PCR. The upper figure shows the positional relationship between the ERVPb1 ORF and the three primer sets. Primer sets 1-3 contain 28, 551 and 1487bp upstream of ERVPb1 ORF, respectively. The lower figure indicates the results of RT-PCR. The RT-PCR primer used were UTR-F1: AAAGTGCAGTCTGAACTGCCGAGAA, UTR-F2: AGAAAACACTGACTCAGACAACAGG, UTR-F3: CCAGTTATATACCTGGGTCGAATTAATGTCCA and ORF-R: GGGGACCCAATCTTGACGTTGAGTG.
