# Supplementary material for: HERV-Derived Ervpb1 Is Conserved in Simiiformes, Exhibiting Expression in Hematopoietic Cell Lineages Including Macrophages
Source: MDPI journal article supplement (doi:10.3390/ijms22094504), 2021-04-26
Supplement: s1 [file s1]

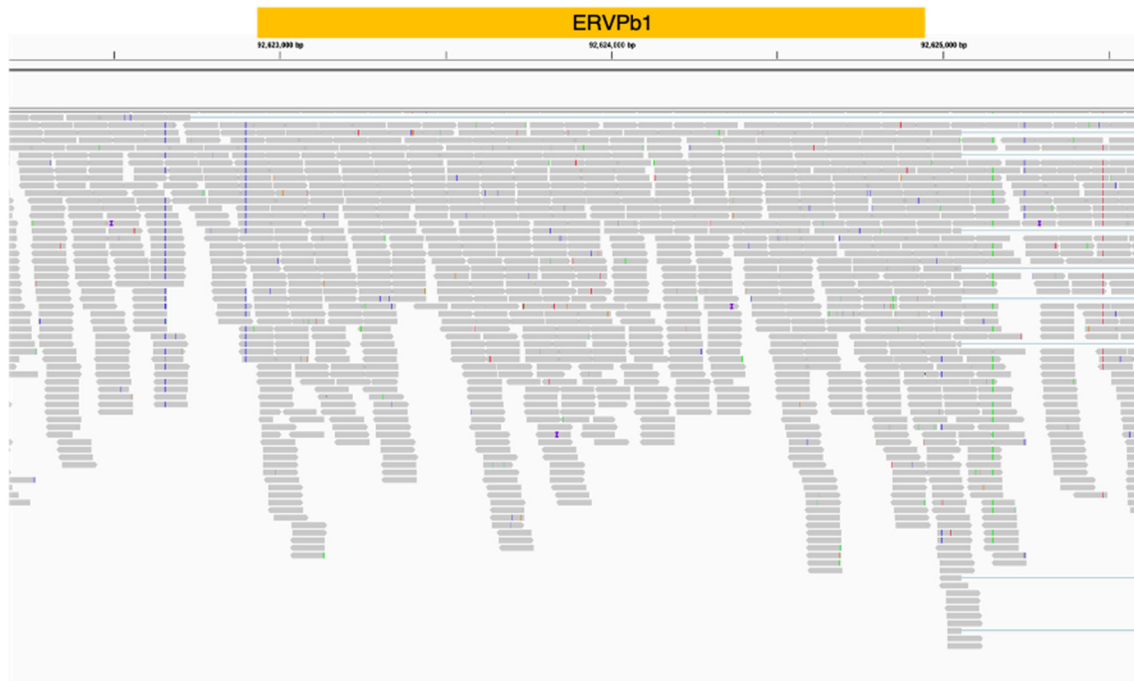

**Figure S2.** IGV browser views of ERVPb1 locus. Human primary monocytes using short-read RNA-seq data registered in the European Genome-phenome Archive (EGA: accession code EGA: EGAS00001001895) from healthy 200 individuals (each 100 Africans and Europeans). Gray box and color bars indicate each read sequence and mutations to adenine (green), guanine (brown), cytosine (blue) and thymine (red).
