# Supplementary material for: HERV-Derived Ervpb1 Is Conserved in Simiiformes, Exhibiting Expression in Hematopoietic Cell Lineages Including Macrophages
Source: Int J Mol Sci. 2021 Apr 26;22(9):4504. doi: 10.3390/ijms22094504 (PMC8123466; doi:10.3390/ijms22094504)
Supplement: Supplementary file 1 [file ijms-22-04504-s001.zip › Table S1 210225.xlsx]

## Sheet: Sheet1
Table 1. RNA-seq data from several tissues and organs.
tissues and organs	SRA ID	RPM
Brain	SRR359290	0.171977
	SRR039628	0.121934
Cerebral cortex	SRR014262	0.125234
Prefrontal cortex	SRR836285	0
Cerebellum	SRR1957125	0.100585
	SRR308481	0
	SRR1927057	0
Hipocumpus	SRR1931817	0.7585
	SRR835930	0.0461571
	SRR308482	0.0315521
Fetal brain	SRR4289782	0
Neuron	SRR447172	0
Bcell	SRR502783	0.00316452
	SRR332281	0
	SRR805725	0
Tcell	SRR2072599	0.214707
	SRR408751	0
	SRR1022993	0
macrophage	SRR5145524	0.331464
	SRR1289650	0
	SRR1268078	0
microglia	SRR5190142	0.0426592
Placenta	ERR315375	0.031215
	SRR635193	0
	SRR1260091	0
heart	SRR014263	0
